# Supplementary material for: Deep eutectic solvent assisted zero-waste electrospinning of lignin fiber aerogels
Source: Royal Society of Chemistry journal article supplement (doi:10.1039/d1gc01872h), 2021-01-01
Supplement: d1gc01872h1.pdf [file d1gc01872h1.pdf]

Electronic Supplementary Information

**Deep eutectic solvent assisted zero-waste electrospinning of  
lignin fiber aerogels**

Kai Rong,<sup>a</sup> Jiale Wei,<sup>a,b</sup> Yuchen Wang,<sup>a,b</sup> Jingwei Liu,<sup>c</sup> Zhen-An Qiao,<sup>c</sup>  
Youxing Fang<sup>a\*</sup> and Shaojun Dong<sup>a,b\*</sup>

<sup>a</sup> State Key Laboratory of Electroanalytical Chemistry, Changchun Institute of Applied  
Chemistry, Chinese Academy of Sciences, Changchun, Jilin 130022, P. R. China

<sup>b</sup> University of Science and Technology of China, Hefei, Anhui 230026, P. R. China

<sup>c</sup> State Key Laboratory of Inorganic Synthesis and Preparative Chemistry, Jilin  
university, Changchun, Jilin 130012, P.R. China

\*E-mail: fangyx@ciac.ac.cn; dongsj@ciac.ac.cn

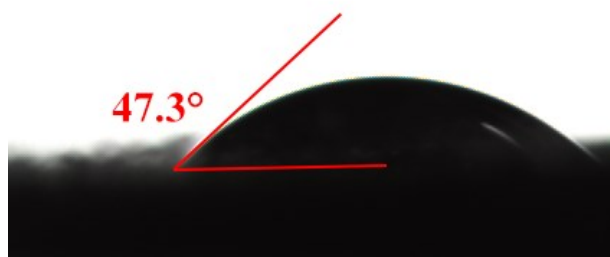

**Fig. S1** Water contact angle of LFA.

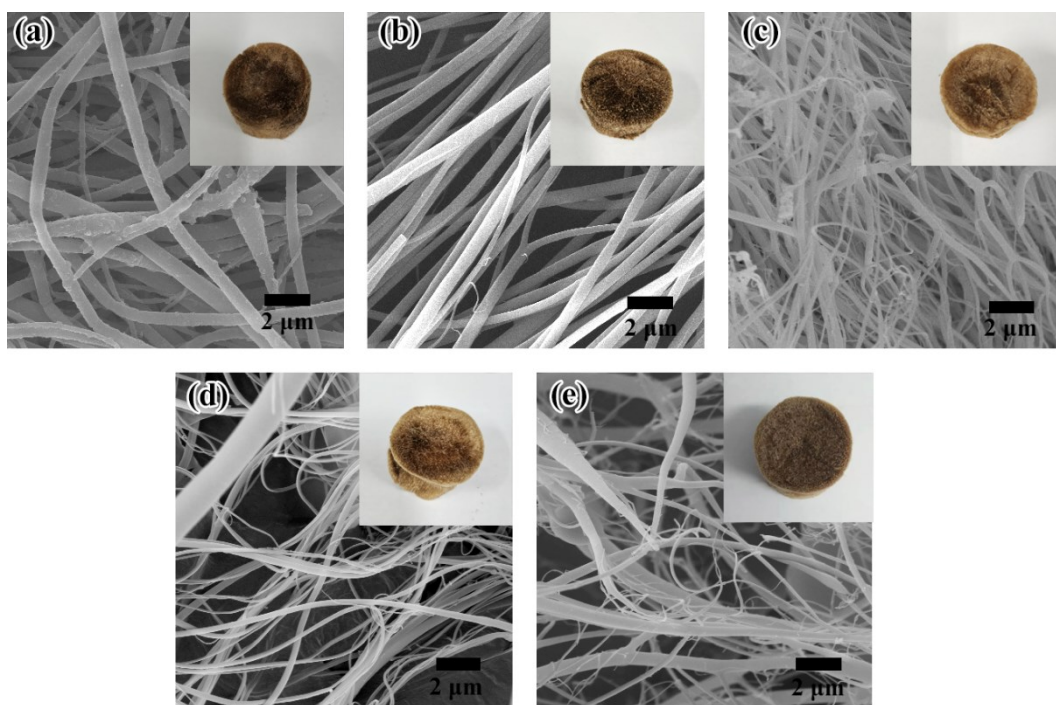

**Fig. S2** (a-e) Photographs (inset) and SEM images of RLFA synthesized with recycled electrospinning solution from the first to the fifth cycle.

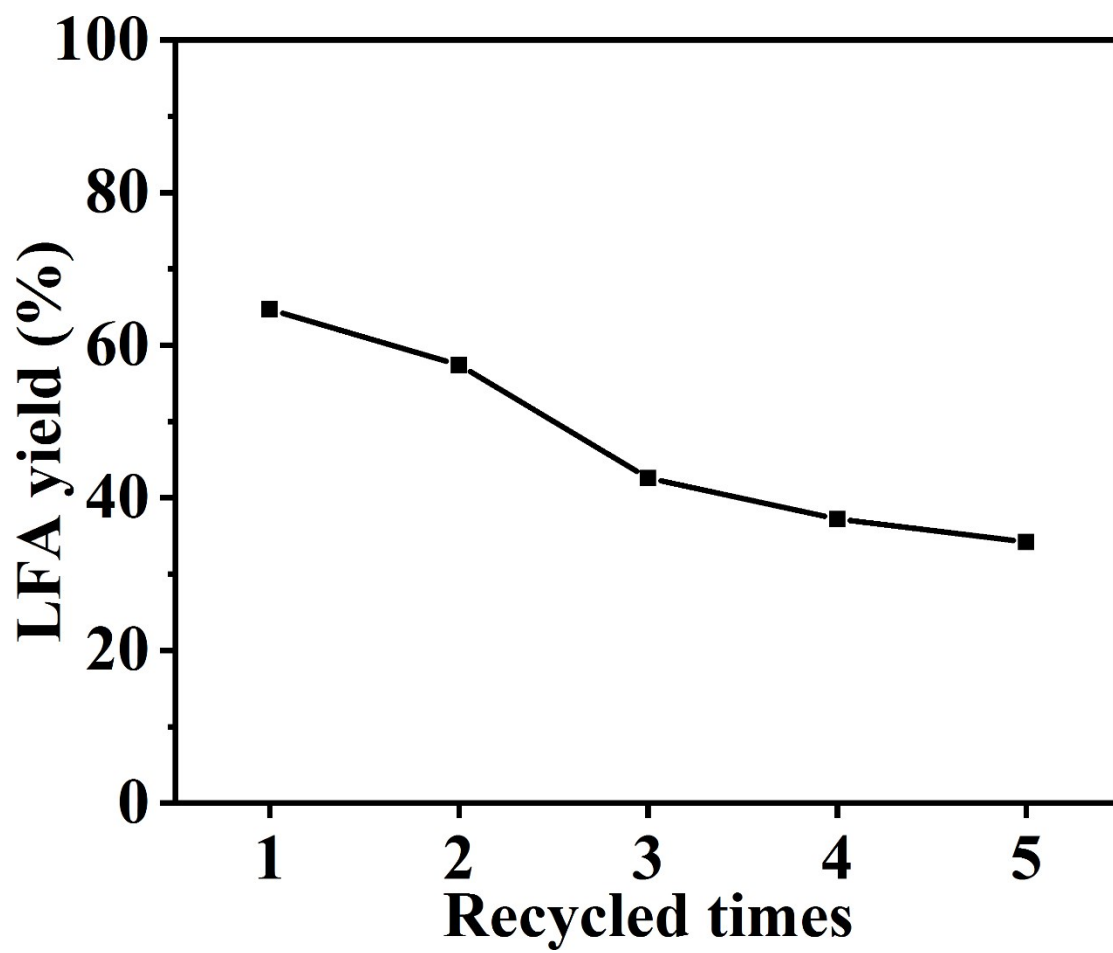

Fig. S3 LFA yield for every cycle.

**Table S1.** DES recovery rates, lignin, PVA, and H<sub>2</sub>O contents of initial electrospinning solution and recycled black liquid for every cycle.

| <b>Electrospinning solution</b>                  | <b>DES recovery rates (wt%)</b> | <b>Lignin content (wt%)</b> | <b>PVA content (wt%)</b> | <b>H<sub>2</sub>O content (wt%)</b> |
|--------------------------------------------------|---------------------------------|-----------------------------|--------------------------|-------------------------------------|
| <b>Initial electrospinning solution</b>          | -                               | 10                          | 2                        | <1                                  |
| <b>Recycled black liquid for the first time</b>  | 57.1                            | 3.12                        | 1.7                      | <1                                  |
| <b>Recycled black liquid for the second time</b> | 64.8                            | 1.31                        | 1.8                      | <1                                  |
| <b>Recycled black liquid for the third time</b>  | 68.4                            | 1.56                        | 1.5                      | <1                                  |
| <b>Recycled black liquid for the fourth time</b> | 51.6                            | 1.07                        | 1.9                      | <1                                  |
| <b>Recycled black liquid for the fifth time</b>  | 81.0                            | 1.33                        | 1.5                      | <1                                  |

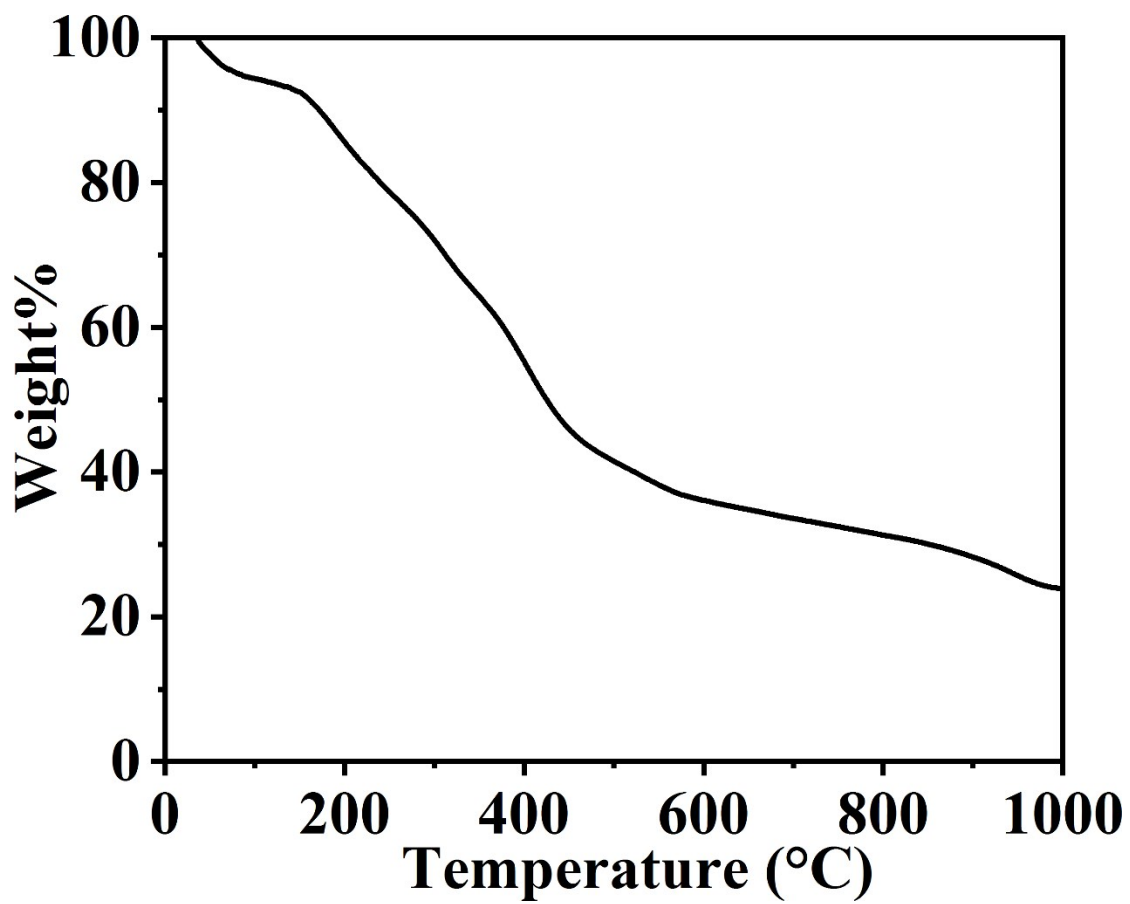

Fig. S4 TGA curve of calcining LFA in N<sub>2</sub> atmosphere.

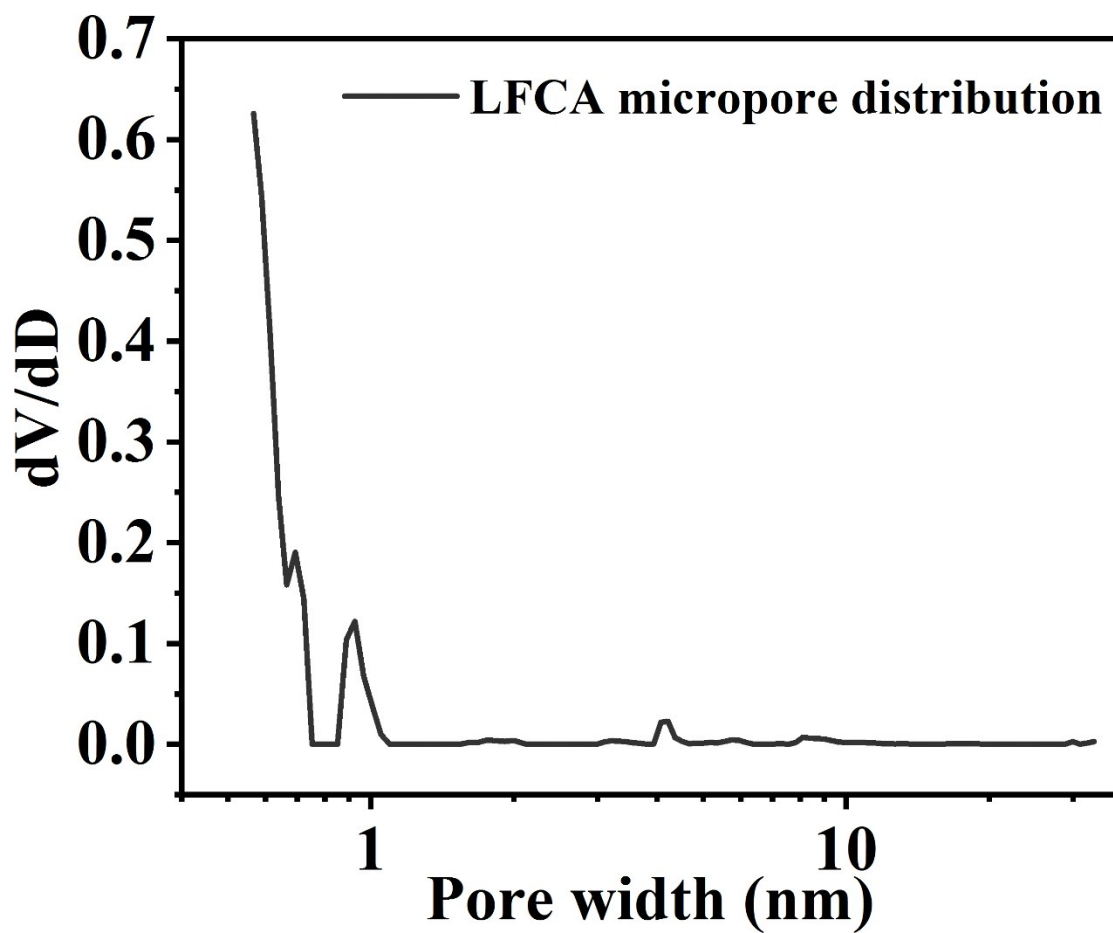

Fig. S5 The micropore distribution of LCFA.

pressed with a pressure of 5 MPa

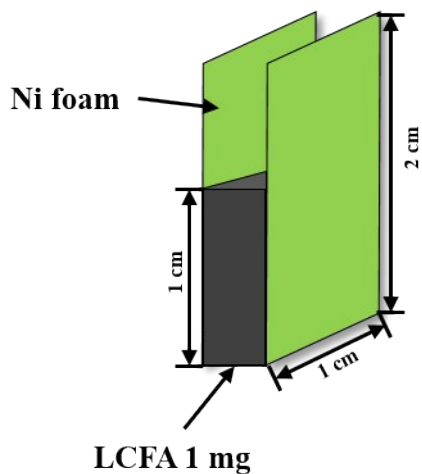

**Fig. S6** Illustration of supercapacitor electrodes made by LCFA material and Ni foams.

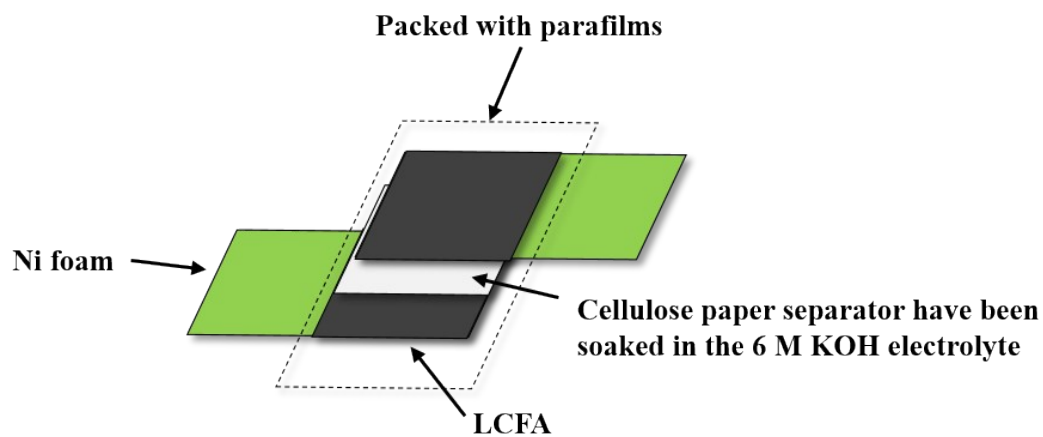

**Fig. S7** Illustration of supercapacitor cell.



**Table S2.** Comparison of supercapacitor cell performances for lignin-based carbon materials.

| <b>Lignin-based supercapacitor material</b>            | <b>Specific surface area (m<sup>2</sup> g<sup>-1</sup>)</b> | <b>Electrolyte</b>                 | <b>Specific capacitance (F g<sup>-1</sup>)</b> | <b>Energy density (Wh kg<sup>-1</sup>)</b> | <b>Capacitance retention</b>           | <b>Reference</b> |
|--------------------------------------------------------|-------------------------------------------------------------|------------------------------------|------------------------------------------------|--------------------------------------------|----------------------------------------|------------------|
| <b>Lignin-based carbon fiber aerogel</b>               | 580                                                         | 6 M KOH                            | 146.8 (at 0.5 A g <sup>-1</sup> )              | 5.04                                       | 98% 5000 <sup>th</sup>                 | This work        |
| <b>Lignin fiber mats</b>                               | 583                                                         | 6 M KOH                            | 64 (at 0.4 A g <sup>-1</sup> )                 | 5.67                                       | 90% 6000 <sup>th</sup>                 | 1                |
| <b>Lignin-derived nanoporous carbon</b>                | 1092                                                        | 1 M H <sub>2</sub> SO <sub>4</sub> | 91 (at 0.5 A g <sup>-1</sup> )                 | 12.8                                       | 80% 10000 <sup>th</sup>                | 2                |
| <b>Lignin-derived carbon aerogels</b>                  | 1681.6                                                      | 1 M H <sub>2</sub> SO <sub>4</sub> | 198.4 (at 0.5 A g <sup>-1</sup> )              | 14.4                                       | 97.4 <sup>th</sup> 10000 <sup>th</sup> | 3                |
| <b>PAN/PMMA/Lignin cross-linking carbon nanofibers</b> | 364                                                         | 6 M KOH                            | 233 (at 0.5 A g <sup>-1</sup> )                | 6.84                                       | 95.8% 50000 <sup>th</sup>              | 4                |

## References

- 1 C. L. Lai, Z. P. Zhou, L. F. Zhang, X. X. Wang, Q. X. Zhou, Y. Zhao, Y. C. Wang, X. F. Wu, Z. T. Zhu and H. Fong, *J. Power Sources*, 2014, **247**, 134-141.
- 2 J. W. Jeon, L. B. Zhang, J. L. Lutkenhaus, D. D. Laskar, J. P. Lemmon, D. Choi, M. I. Nandasiri, A. Hashmi, J. Xu, R. K. Motkuri, C. A. Fernandez, J. Liu, M. P. Tucker, P. B. McGrail, B. Yang and S. K. Nune, *ChemSusChem*, 2015, **8**, 428-432.
- 3 Y. F. Zhang, C. Y. Zhao, W. K. Ong and X. H. Lu, *ACS Sustain. Chem. Eng.*, 2019, **7**, 403-411.
- 4 D. P. Xuan, J. Liu, D. C. Wang, Z. Lu, Q. Liu, Y. X. Liu, S. R. Li and Z. F. Zheng, *Energy Fuels*, 2021, **35**, 796-805.
